# Supplementary material
Source: Springer Nature journal article supplement (https://www.springermedizin.de/resource/supplementary/12874_2008_306_MOESM3_ESM.pdf/9434202)

a: Step 3 completed

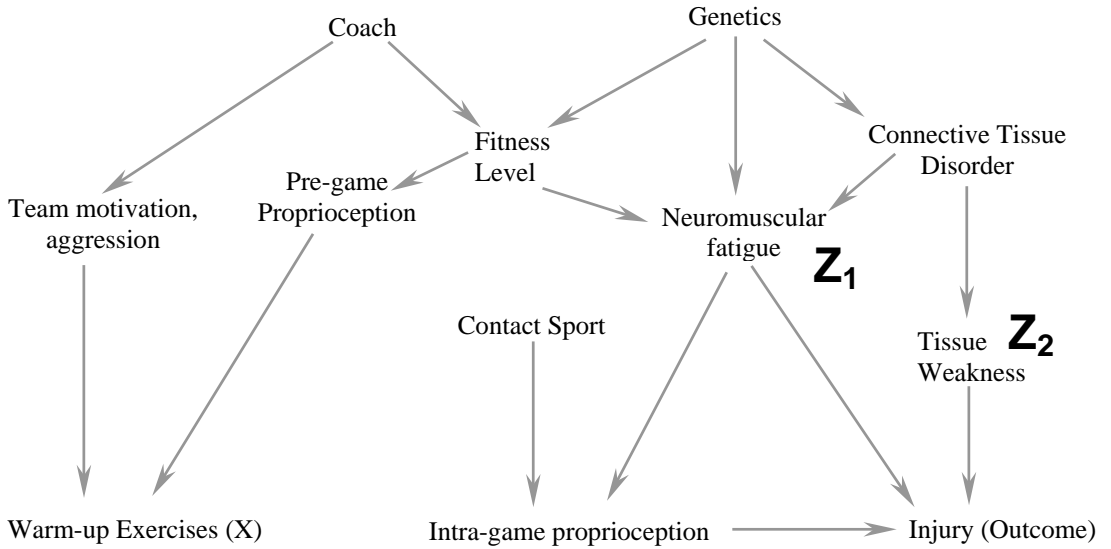

b: Step 4 completed

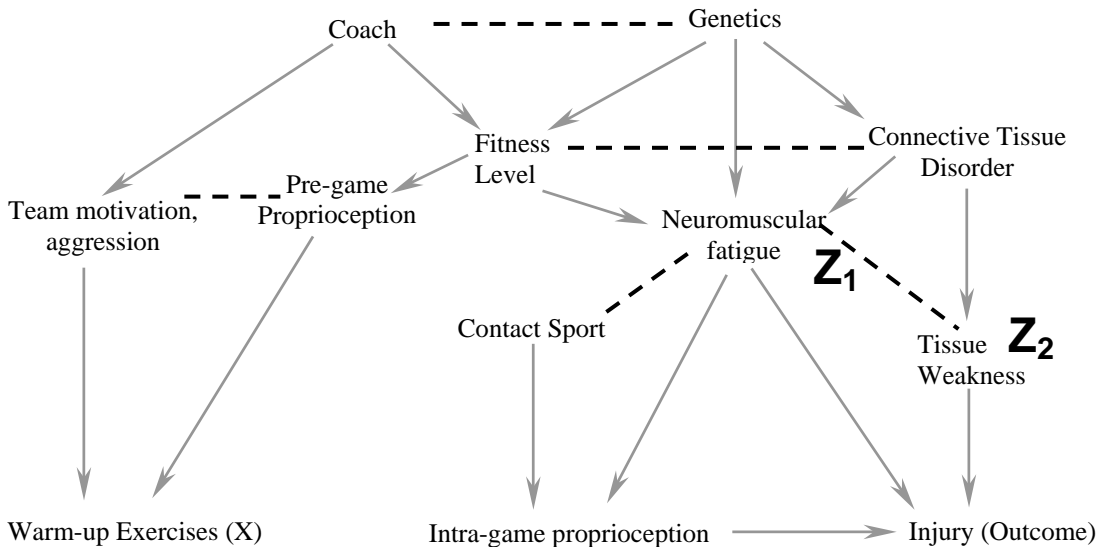

Supplement: MOESM3 [file 9434202]
